# Supplementary material
Source: MDPI journal article supplement (https://www.mdpi.com/2079-9284/5/1/1)
Supplement: s1 [file s1]

Table 1 - Experimental and predicted physical-chemical parameters of the most recently investigated UV-absorbers.

| INCI name (INN/XAN)                        | Chemical structure                                                                  | Brand name                                                                                                              | Absorption spectrum range | Molecular weight (g/mol) <sup>4</sup> | LogP                    | Water solubility (mg/L)        | Melting point (°C)          |
|--------------------------------------------|-------------------------------------------------------------------------------------|-------------------------------------------------------------------------------------------------------------------------|---------------------------|---------------------------------------|-------------------------|--------------------------------|-----------------------------|
| diethylamino hydroxybenzoyl hexyl benzoate | 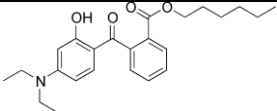   | Uvinul <sup>®</sup> A Plus                                                                                              | UVA1                      | 397.515                               | 5.7-6.2 <sup>1</sup>    | <0.01 (20°C) <sup>1</sup>      | 54; 314 (dec.) <sup>1</sup> |
| Butyl methoxydibenzoylmethane (avobenzene) |    | Eusolex <sup>®</sup> 9020, Parsol <sup>®</sup> 1789                                                                     | UVA                       | 310.393                               | 4.51 <sup>4</sup>       | 2.2 (25°C) <sup>4</sup>        | 83.5 <sup>4</sup>           |
| 4-methylbenzylidene camphor (enzacamene)   |    | Eusolex <sup>®</sup> 6300<br>Parsol <sup>®</sup> 5000<br>Uvinul <sup>®</sup> MBC 95                                     | UVB                       | 258.397                               | 4.95                    | 1.3 (20°C)                     | 66–68                       |
| Octocrylene (octocrilene)                  |    | Eusolex <sup>®</sup> OCR,<br>Parsol <sup>®</sup> 340,<br>Uvinul <sup>®</sup> N539T,<br>NeoHeliopan <sup>®</sup> 303 USP | UVB                       | 361.485                               | 6.78 <sup>3</sup>       | 0.0038 <sup>3</sup>            | N/A                         |
| isoamyl p-methoxycinnamate (amiloxate)     |   | Neo Heliopan <sup>®</sup> E1000                                                                                         | UVB                       | 248.322                               | 3.6 <sup>1</sup>        | 4.9 (25°C) <sup>1</sup>        | N/A                         |
| Ethylhexyl triazone                        |  | Uvinul <sup>®</sup> T150                                                                                                | UVB                       | 823.092                               | > 7(20 °C) <sup>6</sup> | < 0.001 (20.0 °C) <sup>6</sup> | 129 <sup>6</sup>            |

|                                                               |                                                                                   |                                                                                       |           |                      |                                         |                                                                   |                    |
|---------------------------------------------------------------|-----------------------------------------------------------------------------------|---------------------------------------------------------------------------------------|-----------|----------------------|-----------------------------------------|-------------------------------------------------------------------|--------------------|
| Ethylhexyl methoxycinnamate (octinoxate)                      | 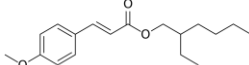 | Parsol <sup>®</sup> MCX, Heliopan <sup>®</sup> New                                    | UVB       | 290.403              | 6.1 <sup>4</sup>                        | 0.041 (24 °C and pH 7.1) <sup>4</sup>                             | N/A                |
| Ethylhexyl dimethyl PABA (padimate-O)                         |  | Escalol <sup>™</sup> 507<br>Arlatone 507<br>Eusolex 6007                              | UVB       | 277.408 <sup>4</sup> | 5.77 <sup>4</sup>                       | 0.54 (25 °C) <sup>4</sup>                                         | N/A                |
| benzophenone-3 (oxybenzone)                                   |  | Eusolex <sup>®</sup> 4360                                                             | UVA2+ UVB | 228.247              | 3.7 <sup>2</sup>                        | 3.7 (20°C) <sup>2</sup>                                           | 62-65 <sup>2</sup> |
| bis-ethylhexyloxyphenol methoxyphenol triazine (bemotrizinol) |  | Tinosorb <sup>®</sup> S                                                               | UVA1+UVB  | 627.826              | 12.6 <sup>1</sup>                       | <10 <sup>-4</sup>                                                 | 80.40 <sup>1</sup> |
| Phenylbenzimidazole sulfonic acid (ensulizole)                |  | Eusolex <sup>®</sup> 232<br>Parsol <sup>®</sup> HS<br>Neo Heliopan <sup>®</sup> Hydro | UVA2+ UVB | 274.294 <sup>5</sup> | -1.1 (pH 5)<br>-2.1 (pH 8) <sup>5</sup> | > 30% (As sodium or triethanolammonium salt at 20°C) <sup>5</sup> | N/A                |

<sup>1</sup> (3)

<sup>2</sup> (34)

<sup>3</sup> (44)

<sup>4</sup> Pubchem

<sup>5</sup> SCCP/1056/06 Opinion on phenylbenzimidazole sulfonic acid and its salts

<sup>6</sup> BASF safety data sheet

Table 2 – In vitro studies for the assessment of skin permeation/penetration of sunscreens.

| Reference | Sun-filter<br>(INCI name)                                                                                                                                                                                        | Formulation                                                         | Substrate                                                                   | Equipment  | T<br>(°C) | Receiving phase                     | Lenght<br>(h) | Analitical<br>procedure                                                                  | Results                                                                                                                           |
|-----------|------------------------------------------------------------------------------------------------------------------------------------------------------------------------------------------------------------------|---------------------------------------------------------------------|-----------------------------------------------------------------------------|------------|-----------|-------------------------------------|---------------|------------------------------------------------------------------------------------------|-----------------------------------------------------------------------------------------------------------------------------------|
| (3)       | Isoamyl p-methoxycinnamate, IPMC<br>- Diethylamino hydroxybenzoyl hexyl benzoate, DHHB<br>- Bis-ethylhexyloxyphenol methoxyphenol triazine, BMZ                                                                  | Biomimetic O/W cream                                                | Full thickness (1mm) porcine ear skin                                       | Franz cell | 30        | 6% Brij PBS                         | 12            | HPLC<br>- receiving phase withdrawn after 12h<br>-SC 15 tape strips<br>-remaining tissue | None of the molecules was detected in the receiving phase after 12h and the sunscreens were largely detected in the 5 tape strips |
| (5)       | Benzophenone-3, BP-3                                                                                                                                                                                             | SLM                                                                 | Porcine ear skin                                                            | Franz cell | 37        | Buffer 150 mM pH7.2 + 0.5% Tween 80 | 12            | tape stripping (SC) and E+D                                                              | SLM with natural waxes are able to inhibit permeation and reduce 3-fold penetration with respect to free B3                       |
| (6)       | Benzophenone-3, BP3                                                                                                                                                                                              | - Emulsion<br>- Emulsion with BP3 encapsulated in mesoporous silica | Cellulose membrane                                                          | Franz cell | 37        | pH 7.4 buffer + 2% tween 20         | 24            | UVvis                                                                                    | Skin permeation of BP3 was prevented due to encapsulation by MS                                                                   |
| (7)       | - Bis-ethylhexyloxyphenol methoxyphenol triazine, BMZ<br>- Ethylhexyl triazone, ETZ<br>- Diethylamino hydroxybenzoyl hexyl benzoate, DHHB<br>- Ethylhexyl methoxycinnamate, OMC<br>- Butyl methoxydibenzoylmetha | NLC                                                                 | Human skin (SC+E separated from the dermis by treatment at 60°C for 2 min.) | Franz cell | 32        | EtOH/water 50:50                    | 24            |                                                                                          | Comparison NLC/nanoemulsion; NLC reduce permeation and the filter remains on the skin surface                                     |

|      |                                                                                                                                                            |                                                                                          |                                       |                                                                                                |    |                                               |    |                                                                               |                                                                                                                                                                                                             |
|------|------------------------------------------------------------------------------------------------------------------------------------------------------------|------------------------------------------------------------------------------------------|---------------------------------------|------------------------------------------------------------------------------------------------|----|-----------------------------------------------|----|-------------------------------------------------------------------------------|-------------------------------------------------------------------------------------------------------------------------------------------------------------------------------------------------------------|
|      | ne, AVO                                                                                                                                                    |                                                                                          |                                       |                                                                                                |    |                                               |    |                                                                               |                                                                                                                                                                                                             |
| (9)  | 4-methylbenzylidene camphor, 4-MBC                                                                                                                         | - 4-MBC polymeric microsphere formulated in O/W emulsion<br>- free 4-MBC in O/W emulsion | Episkin                               | Harvard apparatus                                                                              | 37 | pH 7.4 phosphate buffer 66.7mM + 1% Brij98    | 5  | HPLC tape stripping (2 strips for SC) extraction from remaining E             | Encapsulation in microspheres remarkably reduced the permeation of 4-MBC and increased its retention on the skin surface                                                                                    |
| (13) | - Benzophenone-3, BP3<br>- Butyl methoxydibenzoylmethane, AVO<br>- Zinc oxide, ZnO                                                                         | EtOH/buffer                                                                              | Nude mice - 8 and 24 weeks            | Franz cell                                                                                     | 37 | 30% EtOH/pH 7.4 buffer                        | 24 | - HPLC<br>- atomic abs. differential stripping (20 strips and cyan.)          | UVA and UVA/UVB increase follicular uptake for BP-3 and AVO, particularly for senescent skin;<br>ZnO no permeation/penetration; AVO no permeation and penetration higher for young skin                     |
| (14) | Ethylhexyl dimethyl PABA                                                                                                                                   | Bioadhesive nanoparticles (BNP)                                                          | Fresh pig skin                        | Incubation of skin with formulation in humidity chamber and subsequent washing with PBS buffer | 32 | /                                             | 6  | HPLC tape stripping 30 times, remaining skin chopped and extraction performed | No PO penetrated in the skin from PO/BNPs; minimal amounts were found in the tape stripped skin, suggesting minimal epidermal penetration                                                                   |
| (16) | - Bis-ethylhexyloxyphenol methoxyphenol triazine (BMZ)<br>- Ethylhexyl methoxycinnamate, OMC<br>- Butyl methoxydibenzoylmethane, AVO<br>- Octocrylene, OCT | O/W Emulsion                                                                             | Porcine ear skin dermatomed at 500 µm | Franz cell                                                                                     | 32 | Phosphate buffer (pH 7.4 - 0.1M) + 4% w/v BSA | 12 | HPLC tape stripping (16 strips) and E+D cut in little pieces                  | The permeated amounts were below LLOQ; over 90% was retained in the SC; the presence of both resveratrol and carotene reduced the amount of UV filters in the SC; BMZ exhibited the lowest penetration rate |

|      |                                                                                                                      |                                                                                                                   |                                             |            |    |                                                        |    |                                                                          |                                                                                                                                                                                         |
|------|----------------------------------------------------------------------------------------------------------------------|-------------------------------------------------------------------------------------------------------------------|---------------------------------------------|------------|----|--------------------------------------------------------|----|--------------------------------------------------------------------------|-----------------------------------------------------------------------------------------------------------------------------------------------------------------------------------------|
|      | - Resveratrol<br>□□β-Carotene                                                                                        |                                                                                                                   |                                             |            |    |                                                        |    |                                                                          |                                                                                                                                                                                         |
| (34) | Benzophenone-3, BP3                                                                                                  | SLN<br>NLC<br>NPLC<br>NC                                                                                          | Porcine ear skin<br>dermatomed at<br>600 μm | Franz cell | 37 | Albumina PBS<br>solution                               | 24 | HPLC<br>- SC: 20 tape<br>strips<br>-E and D<br>separated with<br>scalpel | NPLC and NC were able<br>to significantly reduce<br>BP-3 flux across the<br>skin, exhibiting high in<br>vitro SPF                                                                       |
| (35) | - Butyl<br>methoxydibenzoylmetha<br>ne, AVO<br>- Benzophenone-3, BP-3<br>- Phenylbenzimidazole<br>sulfonic acid, ESZ | Complex with<br>β-cyclodextrin<br>o/w cream                                                                       | Wistar male rats<br>abdominal skin          | Franz cell | 37 | phosphate buffer<br>7.4 and isopropyl<br>alcohol 70:30 | 6  | HPLC                                                                     | ESZ permeated the rat<br>skin in a higher amount;<br>the complex BP-3-CD<br>was found to be the<br>safest one, both in terms<br>of slow rate of<br>permeation and<br>prolonged lag-time |
| (41) | Butyl<br>methoxydibenzoylmetha<br>ne, AVO                                                                            | - AVO<br>encapsulated in<br>modified<br>dextrin<br>formulated in<br>O/W emulsion<br>- free AVO in<br>O/W emulsion | Cellulose<br>membrane                       | Franz cell | 37 | pH 5.5 buffer + 2%<br>tween 20                         | 6  |                                                                          | Avobenzene<br>encapsulated in modified<br>dextrin and dispersed<br>in an emulsion<br>exhibited a transdermal<br>flux 2.5-fold lower than<br>free avobenzene.                            |
